# Supplementary material for: Linkage engineering mediated carriers transfer and surface reaction over carbon nitride for enhanced photocatalytic activity
Source: Royal Society of Chemistry journal article supplement (doi:10.1039/d1ta03813c), 2021-01-01
Supplement: d1ta03813c1.pdf [file d1ta03813c1.pdf]

## Electronic Supplementary Information

### **Linkage engineering mediated carriers transfer and surface reaction over carbon nitride for enhanced photocatalytic activity**

Shilian Yang,<sup>a,#</sup> Qian Wang,<sup>a,#</sup> Qiuchen Wang,<sup>a</sup> Gen Li,<sup>a</sup> Tianxiang Zhao,<sup>a</sup> Peng Chen,<sup>a,\*</sup> Fei Liu<sup>a,\*</sup> and Shuang-Feng Yin<sup>b,\*</sup>

<sup>a</sup> Provincial Guizhou Key Laboratory of Green Chemical and Clean Energy Technology, School of Chemistry and Chemical Engineering, Guizhou University, Guiyang 550025, Guizhou, China

<sup>b</sup> State Key Laboratory of Chemo/Biosensing and Chemometrics, Provincial Hunan Key Laboratory for Cost-effective Utilization of Fossil Fuel Aimed at Reducing Carbon-dioxide Emissions, College of Chemistry and Chemical Engineering, Hunan University, Changsha 410082, Hunan, China

E-mail: pchen3@gzu.edu.cn (P. Chen), ce.feiliu@gzu.edu.cn (F. Liu)  
sf\_yin@hnu.edu.cn (S. F. Yin)

# These authors contribute equally to this work

**Table S1.** Estimation of O, C and N contents of as-fabricated samples by XPS.

| Samples                       | C    | N    | O   |
|-------------------------------|------|------|-----|
| C <sub>3</sub> N <sub>4</sub> | 46.9 | 50.8 | 2.3 |
| COCN-1                        | 16.2 | 78.7 | 5.1 |
| COCN-2                        | 44.9 | 51.5 | 3.6 |
| COCN-3                        | 38.5 | 58.9 | 2.6 |

**Table S2.** Binding energy and area ratio of C 1s over as prepared samples

| Samples                       | C-H <sub>2</sub> |                      | C=C        |                      | C-NH       |                      | N=C-N      |                      | C-O        |                      |
|-------------------------------|------------------|----------------------|------------|----------------------|------------|----------------------|------------|----------------------|------------|----------------------|
|                               | BE<br>(eV)       | Area<br>ratio<br>(%) | BE<br>(eV) | Area<br>ratio<br>(%) | BE<br>(eV) | Area<br>ratio<br>(%) | BE<br>(eV) | Area<br>ratio<br>(%) | BE<br>(eV) | Area<br>ratio<br>(%) |
| C <sub>3</sub> N <sub>4</sub> | -                | -                    | 284.6      | 26.37                | 286.3      | 6.29                 | 288.2      | 67.34                | -          | -                    |
| COCN-1                        | 284.1            | 5.4                  | 284.6      | 18.0                 | 286.0      | 2.7                  | 287.8      | 64.5                 | 287.4      | 9.4                  |
| COCN-2                        | 284.1            | 6.9                  | 284.6      | 13.2                 | 286.1      | 1.8                  | 287.8      | 72.0                 | 287.3      | 6.1                  |
| COCN-3                        | 284.1            | 3.2                  | 284.6      | 9.4                  | 286.6      | 2.3                  | 287.9      | 79.4                 | 287.7      | 5.7                  |

**Table S3.** Binding energy and area ratio of N 1s over as prepared samples

| Samples | C-N=C      |                   | N-(C <sub>3</sub> ) |                   | N-H <sub>x</sub> |                   |
|---------|------------|-------------------|---------------------|-------------------|------------------|-------------------|
|         | BE<br>(eV) | Area ratio<br>(%) | BE<br>(eV)          | Area ratio<br>(%) | BE<br>(eV)       | Area ratio<br>(%) |

|                               |       |       |       |       |       |       |
|-------------------------------|-------|-------|-------|-------|-------|-------|
| C <sub>3</sub> N <sub>4</sub> | 398.3 | 76.94 | 399.7 | 14.64 | 400.7 | 8.42  |
| COCN-1                        | 398.5 | 73.44 | 399.7 | 14.49 | 400.9 | 12.07 |
| COCN-2                        | 398.4 | 74.65 | 399.7 | 15.16 | 400.9 | 10.19 |
| COCN-3                        | 398.6 | 75.05 | 400.1 | 16.22 | 401.1 | 8.73  |

**Table S4.** Binding energy and area ratio of O 1s over as prepared samples

| Samples | Adsorbed oxygen |            | Adsorbed H <sub>2</sub> O |            | C-O   |            |
|---------|-----------------|------------|---------------------------|------------|-------|------------|
|         | BE              | Area ratio | BE                        | Area ratio | BE    | Area ratio |
|         | (eV)            | (%)        | (eV)                      | (%)        | (eV)  | (%)        |
| COCN-1  | 531.5           | 62.1       | 532.6                     | 30.6       | 533.7 | 7.3        |
| COCN-2  | 531.6           | 62.2       | 532.7                     | 31.5       | 533.7 | 6.3        |
| COCN-3  | 531.6           | 63.4       | 532.7                     | 31.5       | 533.8 | 5.1        |

**Table S5.** Comparison of different catalysts for photocatalytic HER.

| Ref. | Catalysts                                         | Reaction Condition                                                                                                       | Time (h) | Oxidant        | Conv. (%) | Sel. (%) |
|------|---------------------------------------------------|--------------------------------------------------------------------------------------------------------------------------|----------|----------------|-----------|----------|
| S1   | Wrinkled C <sub>3</sub> N <sub>4</sub> nanosheets | thioanisole (0.5 mmol), methanol (5 mL), $\lambda > 400$ nm, R.T.                                                        | 1        | Air            | 60        | >99      |
| S2   | CdS/C <sub>3</sub> N <sub>4</sub>                 | thioanisole (0.3 mmol), catalyst (5 mg), methanol (3 mL), $\lambda > 420$ nm, R.T.                                       | 6        | O <sub>2</sub> | 61.88     | >99      |
| S3   | C <sub>60</sub> /g-C <sub>3</sub> N <sub>4</sub>  | thioanisole (0.2 mmol), catalyst (30 mg), CH <sub>3</sub> OH (5 mL), $\lambda > 400$ nm, R.T.                            | 10       | Air            | 94.35     | 100      |
| S4   | Nb <sub>2</sub> O <sub>5</sub>                    | thioanisole (0.25 mmol), catalyst (25 mg), CH <sub>3</sub> OH (0.5 mL), ARS (0.5 mmol), TEMPO (5 mmol), green LEDs, R.T. | 1.3      | O <sub>2</sub> | 94        | >99      |

|     |                                                                               |                                                                                                                                     |    |                  |     |     |
|-----|-------------------------------------------------------------------------------|-------------------------------------------------------------------------------------------------------------------------------------|----|------------------|-----|-----|
| S5  | BN@TTC<br>OP                                                                  | thioanisole (0.2 mmol),<br>catalyst (10 mg), CH <sub>3</sub> OH<br>(3.0 mL), LED lamp, R.T.                                         | 8  | O <sub>2</sub>   | >99 | >99 |
| S6  | polydopamine @ TiO <sub>2</sub>                                               | thioanisole (0.3 mmol),<br>catalyst (50 mg),<br>TEMPO (0.015 mmol),<br>460 nm blue LEDs,<br>CH <sub>3</sub> OH (1 mL), R.T.         | 6  | O <sub>2</sub>   | 86  | 81  |
| S7  | IEP-7                                                                         | thioanisole (0.3 mmol),<br>EtOH/H <sub>2</sub> O (2 mL), green-<br>LED irradiation ( $\lambda$ =525<br>nm), R.T.                    | 24 | H <sub>2</sub> O | 77  | 100 |
| S8  | Zr <sub>6</sub> -Irphen                                                       | thioanisole (0.25 mmol),<br>catalyst (4 mol %), H <sub>2</sub> O (4<br>mL), blue LED, R.T.                                          | 12 | O <sub>2</sub>   | 100 | 100 |
| S9  | Zr <sub>12</sub> -NBC                                                         | thioanisole (0.3 mmol),<br>catalyst (2 mol % ratio),<br>methanol (4 mL). blue<br>LED, R.T.                                          | 10 | Air              | 100 | 100 |
| S10 | C,N-TiO <sub>2</sub>                                                          | thioanisole (0.3 mmol),<br>acetonitrile (5 mL), 300 W<br>Xe lamp                                                                    | 6  | Air              | 100 | 100 |
| S11 | DhaTph-Zn                                                                     | catalyst (10 mg),<br>thioanisole (0.05 mmol),<br>CH <sub>3</sub> CN (2 mL) and<br>CH <sub>3</sub> OH (1 mL), $\lambda > 400$<br>nm. | 10 | O <sub>2</sub>   | 82  | >99 |
| S12 | Pt@ imine-<br>based COF                                                       | Thioanisole (0.3 mmol)<br>catalyst (2.4 mg), CH <sub>3</sub> OH<br>(2 mL), blue light.                                              | 8  | O <sub>2</sub>   | 100 | 100 |
| S13 | anthraquinone<br>functionalized COF<br>linked by<br>$\beta$ -<br>ketoenamines | thioanisole (0.1 mmol),<br>photocatalyst (10 mg),<br>CH <sub>3</sub> CN (2.0 mL), $\lambda =$<br>(400–780 nm)                       | 3  | O <sub>2</sub>   | >99 | 97  |
| S14 | C <sub>60</sub> @PCN-<br>222                                                  | photocatalyst (20 mg),<br>thioethers (0.2 mmol),<br>CH <sub>3</sub> OH (5 mL), $\lambda > 400$<br>nm                                | 3  | Air              | >99 | 100 |
| S15 | Incorporated carbonyl                                                         | thioanisole (0.5 mmol),<br>photocatalyst (5 mg),                                                                                    | 8  | O <sub>2</sub>   | >99 | >99 |

|           |                                 |                                  |     |     |     |
|-----------|---------------------------------|----------------------------------|-----|-----|-----|
|           | groups in acetonitrile (2 mL),  |                                  |     |     |     |
|           | g-C <sub>3</sub> N <sub>4</sub> | xenon lamp (50 W)                |     |     |     |
|           |                                 | without filter                   |     |     |     |
| This work | COCN-2                          | thioanisole (0.5 mmol), 3        | Air | >99 | >99 |
|           |                                 | photocatalyst (20 mg),           |     |     |     |
|           |                                 | acetonitrile (2 mL), $\lambda >$ |     |     |     |
|           |                                 | 420 nm                           |     |     |     |

---

**Table S6.** Zeta potentials of the as-prepared photocatalysts.

| Test time | C <sub>3</sub> N <sub>4</sub> (mV) | COCN-3 (mV) | COCN-2 (mV) | COCN-1 (mV) |
|-----------|------------------------------------|-------------|-------------|-------------|
| 1         | -37.53                             | -62.28      | -71.63      | -66.04      |
| 2         | -42.35                             | -67.07      | -73.29      | -68.70      |
| 3         | -41.04                             | -68.20      | -77.42      | -65.52      |
| 4         | -41.02                             | -63.24      | -75.36      | -66.77      |
| 5         | -42.57                             | -61.37      | -74.94      | -64.53      |
| 6         | -42.32                             | -60.96      | -76.83      | -66.63      |
| Average   | -41.14                             | -63.85      | -74.91      | -66.37      |

---

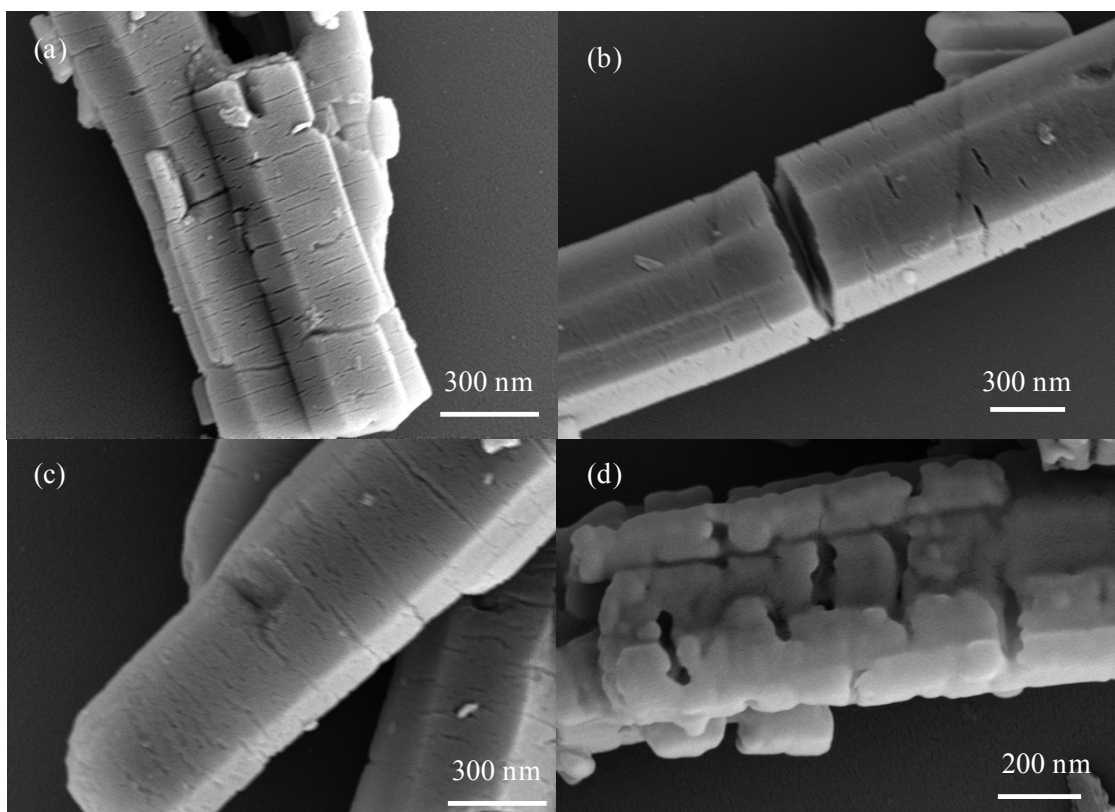

**Fig. S1.** SEM images of (a) melem, (b) trimethylolmelem, (c) precursor and (d) COCN-2.

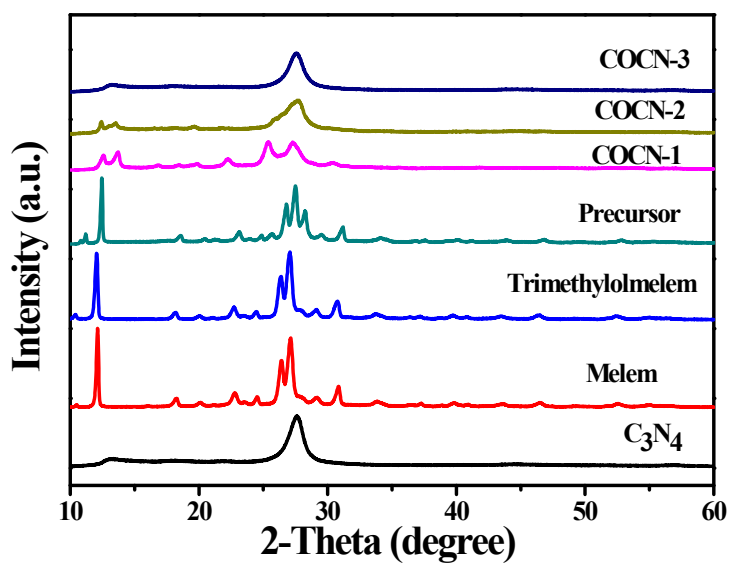

**Fig. S2.** XRD patterns of as-fabricated samples.

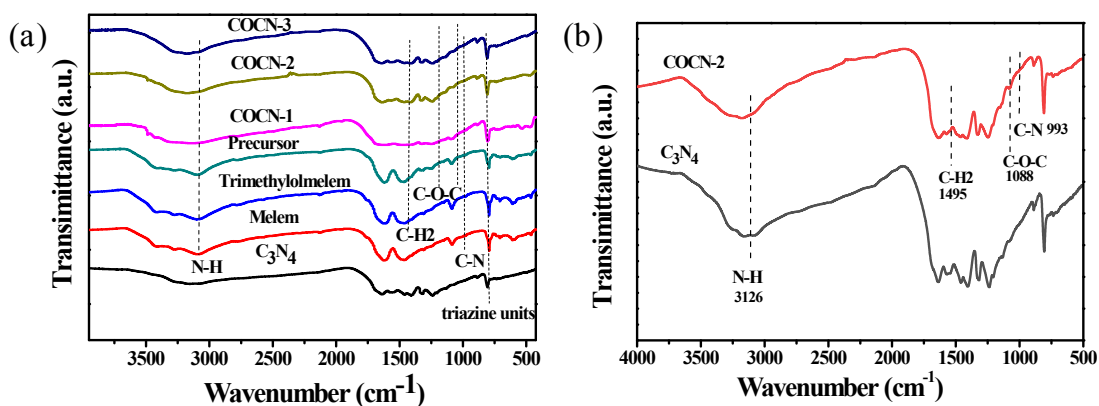

**Fig. S3.** FTIR spectra of as-fabricated samples.

The structure of COCN was analysed through FTIR spectra to confirm carbon and C-O-C incorporation, as shown in Fig. S3. The signal at  $811\text{ cm}^{-1}$  is assigned to the heptazine rings of the conjugated  $\text{C}_3\text{N}_4$  heterocycles. The broad peaks between  $2900\text{ cm}^{-1}$  and  $3500\text{ cm}^{-1}$  belong to hydroxyl ( $-\text{OH}$ ) and  $\text{N-H}$  stretching, indicating that the  $\text{NH}$  and  $\text{OH}$  groups exist in the COCN and trimethylolmelem, respectively. The new bands can be observed at  $993\text{ cm}^{-1}$  ( $\text{C-N}$ ),  $1495\text{ cm}^{-1}$  ( $\text{C-H}_2$ ) and  $3126\text{ cm}^{-1}$  ( $\text{N-H}$ ), implying the generation of  $\text{N-CH}_2\text{-N}$  species in the structure of COCN and precursor.<sup>S16-S18</sup> Furthermore, the characteristic mode of the  $\text{C-O-C}$  vibration appears at  $1088\text{ cm}^{-1}$  in COCN and precursor,<sup>S19-S20</sup> suggesting the synthesis of materials exist two forms chains as illustrated in Fig. 1a.

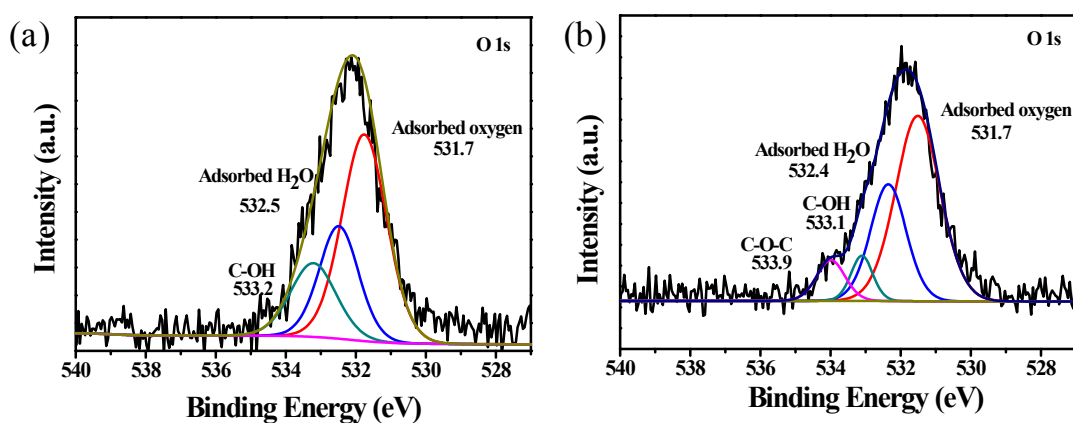

**Fig. S4.** O1s high-resolution spectra of (a) trimethylolhmelem and (b) precursor.

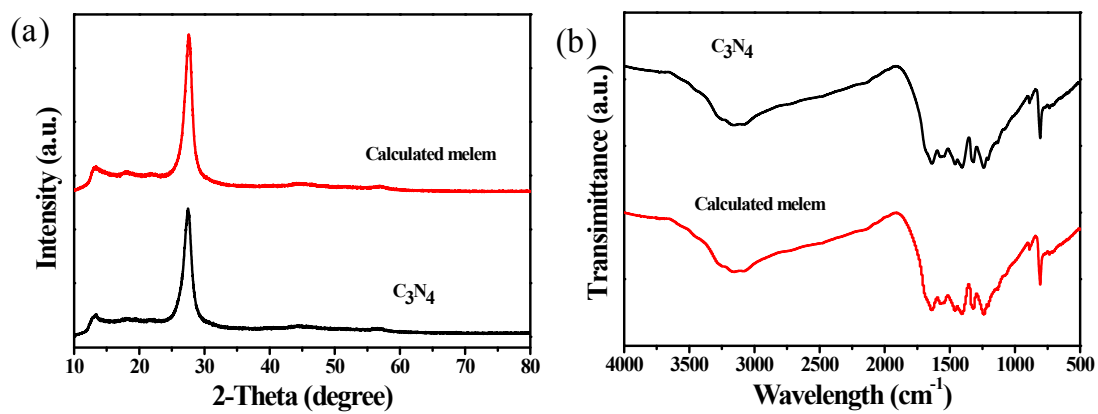

**Fig. S5.** (a) XRD patterns and (b) FTIR spectra of as-fabricated samples.

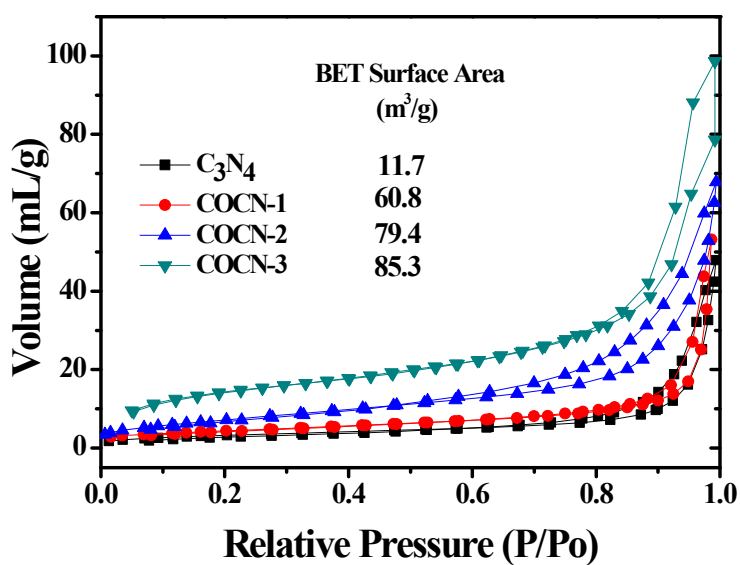

**Fig. S6.** N<sub>2</sub> sorption isotherms of as-fabricated with the BET surface area data provided as inset.



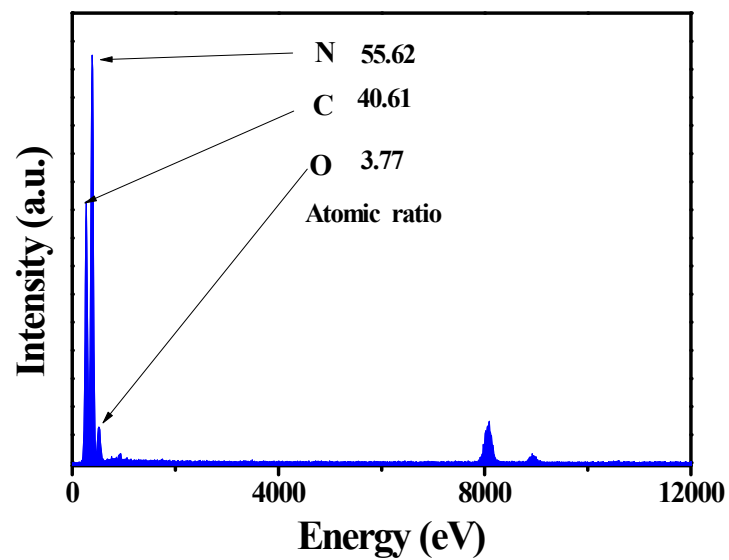

Fig. S7. EDS images of COCN-2.

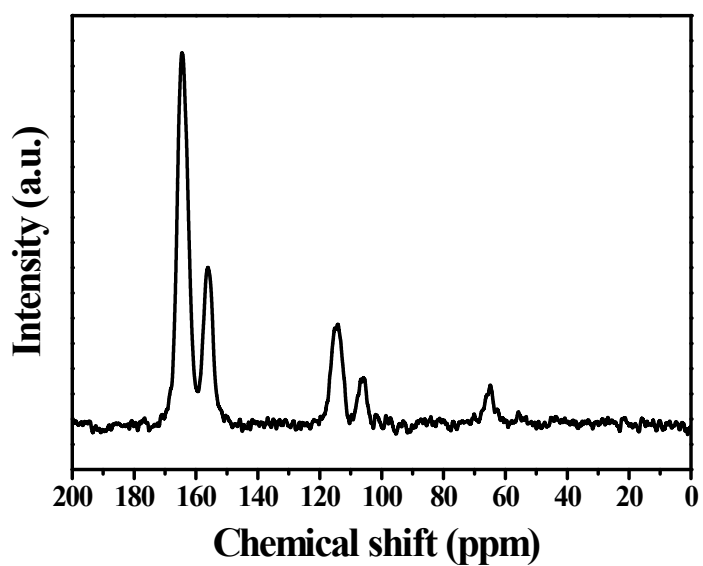

Fig. S8. solid-state  $^{13}\text{C}$  NMR spectra of COCN-2.

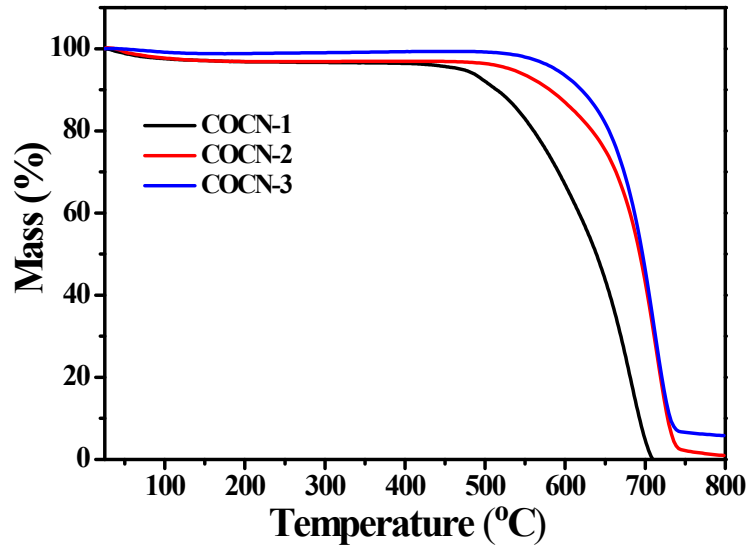

**Fig. S9.** The TG curves of COCN-1, COCN-2 and COCN-3

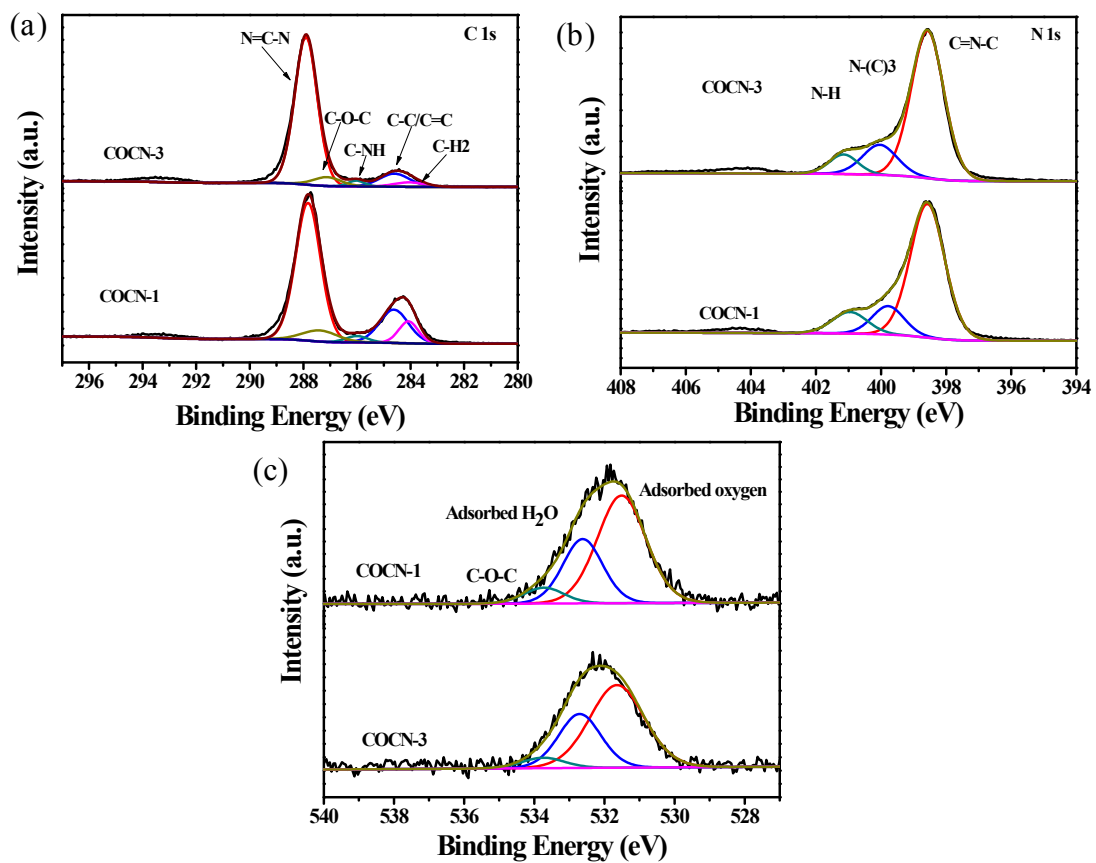

**Fig. S10.** High-resolution XPS spectra of COCN-1 and COCN-3: (a) C 1s, (b) N 1s and (c) O 1s.

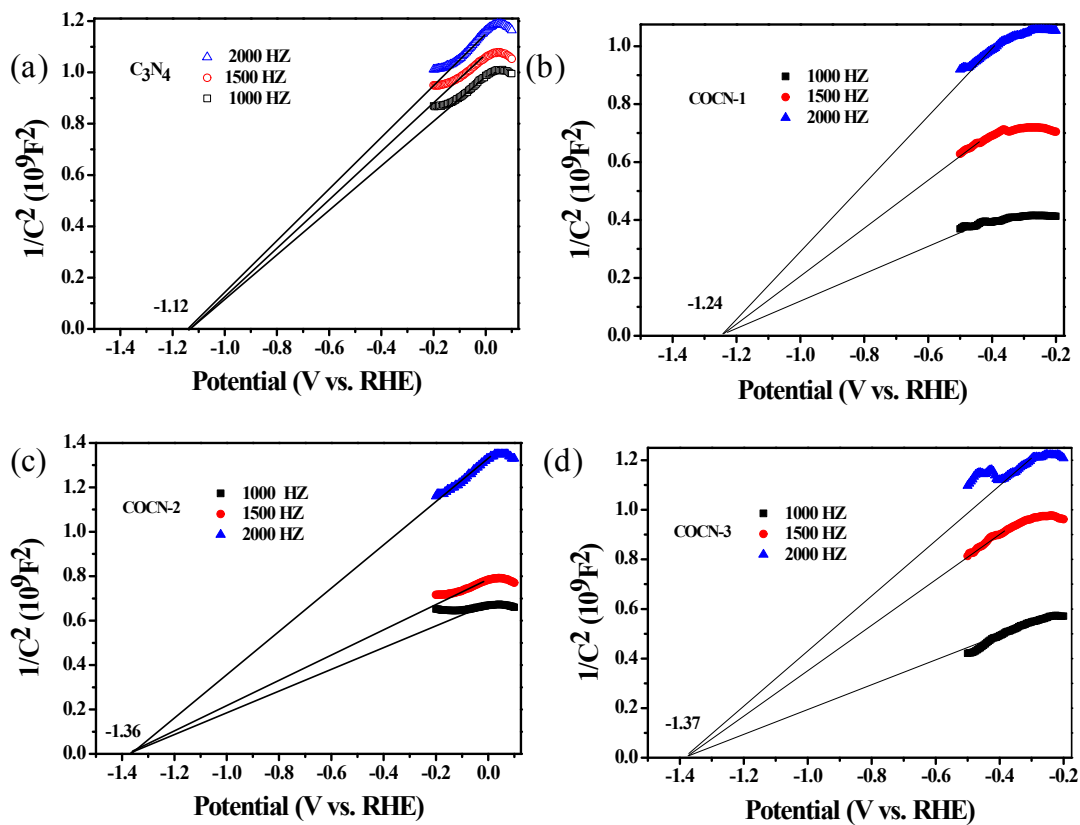

**Fig. S11.** Mott-Schottky plots of fabricated samples: (a)  $C_3N_4$ , (b) COCN-1, (c) COCN-2 and (d) COCN-3.

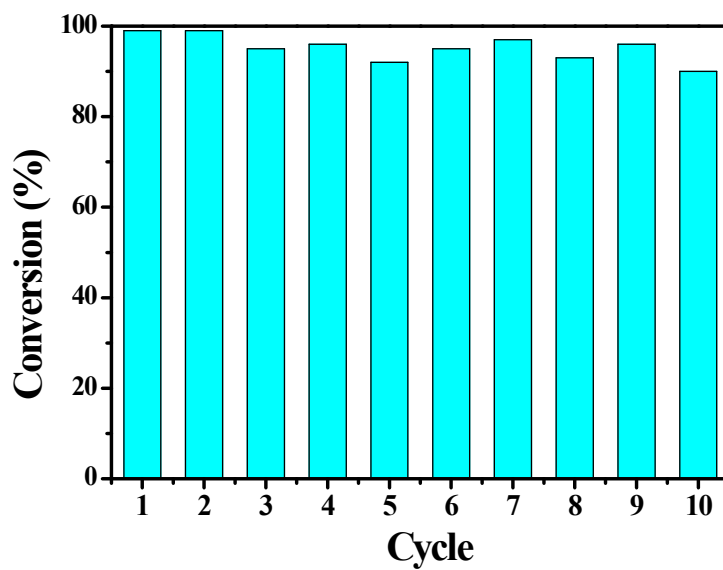

**Fig. S12.** Cycling test of photocatalytic selective oxidation of sulfides over COCN-2.

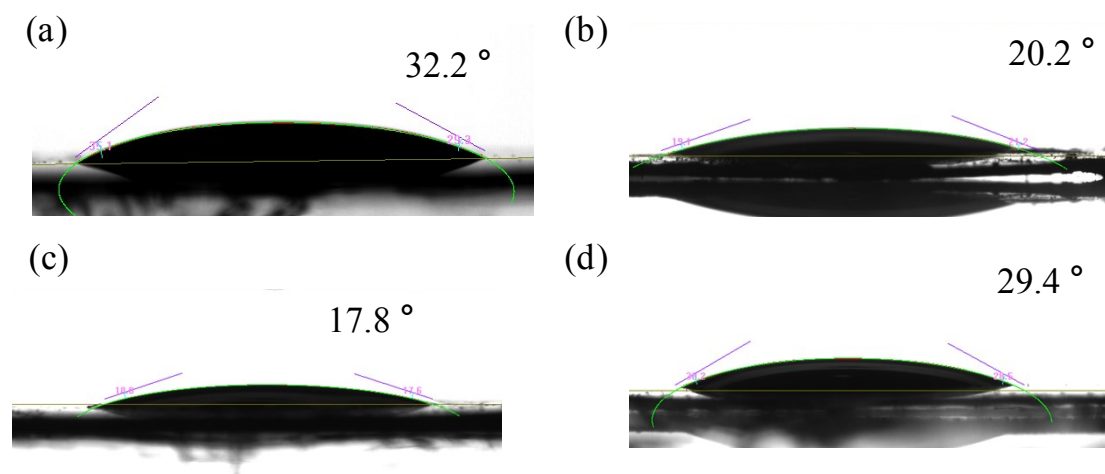

**Fig. S13.** Contact-angle of thioanisole on the surface of (a)  $C_3N_4$ , (b) COCN-1, (c) COCN-2 and (d) COCN-3.

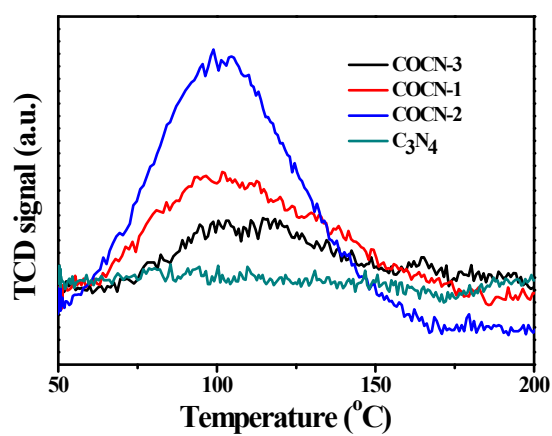

**Fig. S14.**  $O_2$ -temperature programmed desorption spectra of fabricated samples.

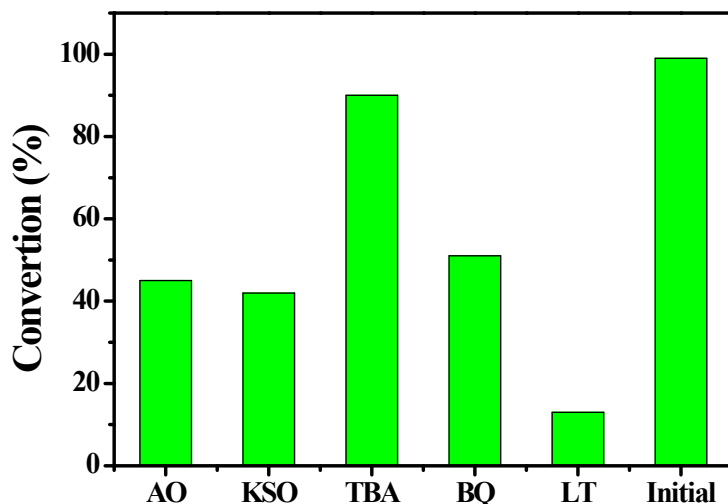

**Fig. S15.** Photocatalytic selective oxidation of sulfides over COCN-2 with or without a scavenger. Ammonium oxalate (AO), Potassium persulfate (KSO), p-benzoquinone (BQ) and tert-butanol (TBA) as scavengers for hole ( $h^+$ ), electron ( $e^-$ ), superoxide radical ( $O_2^{\cdot-}$ ) and hydroxyl radical ( $\cdot OH$ ) trapping, respectively.

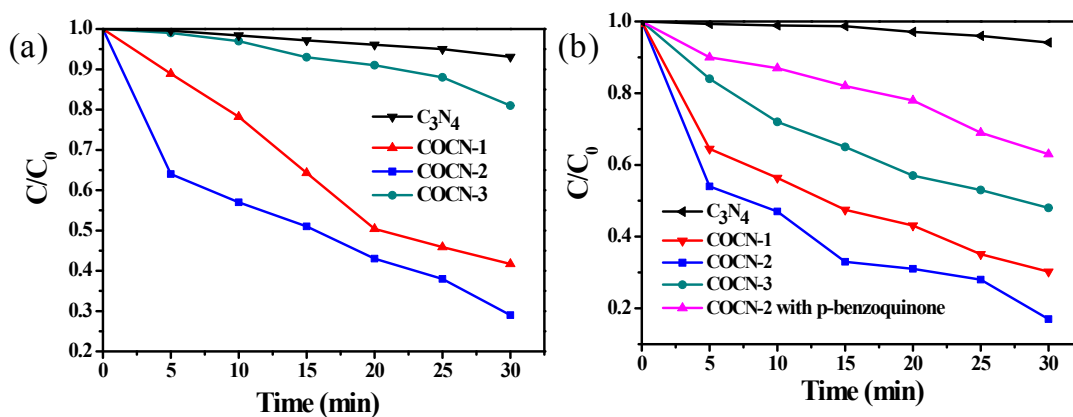

**Fig. S16.** Photocatalytic degradation of (a) Nitro blue tetrazolium (NBT) and (b) 1,3-diphenylisobenzofuran (DPBF) over different catalysts.

Superoxide radical detection: Briefly, the reaction mixture contained acetonitrile (10 mL), catalyst (20 mg) and nitro blue tetrazolium (NBT, 20 mg). Prior to

irradiation, the mixture was magnetically stirred in the dark for 30 min to establish adsorption-desorption equilibrium. The light source was a 300 W Xe-arc lamp equipped with a 420 nm filter to cut off UV light. The amount of superoxide radicals was identified by a Cary-100 spectrophotometer to record the absorbance change at the wavelength of 280 nm. The mole ratio of generated superoxide radicals and degraded NBT was 4:1 according to the report of Wei et al.<sup>S21</sup>

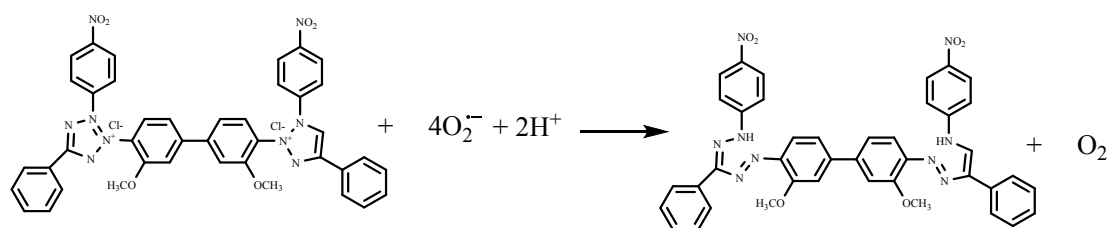

Singlet oxygen detection: Briefly, the reaction mixture contained acetonitrile (10 mL), catalyst (20 mg), and 1,3-diphenylisobenzofuran (DPBF, 20 mg ). The light source was a 300 W Xe-arc lamp equipped with a 420 nm filter to cut off UV light. The concentration of singlet oxygen was identified by a Cary-100 spectrophotometer to record the absorbance change at the wavelength of 410 nm. The mole of generated singlet oxygen was calculated by the report of Chen et al.<sup>S22</sup>

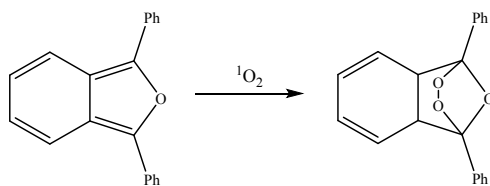

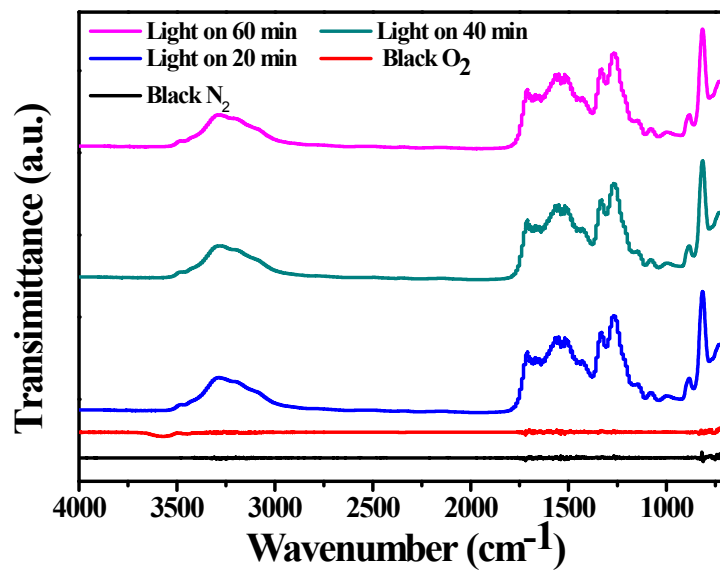

Fig. S17. *In situ* FT-IR spectra of COCN-2.

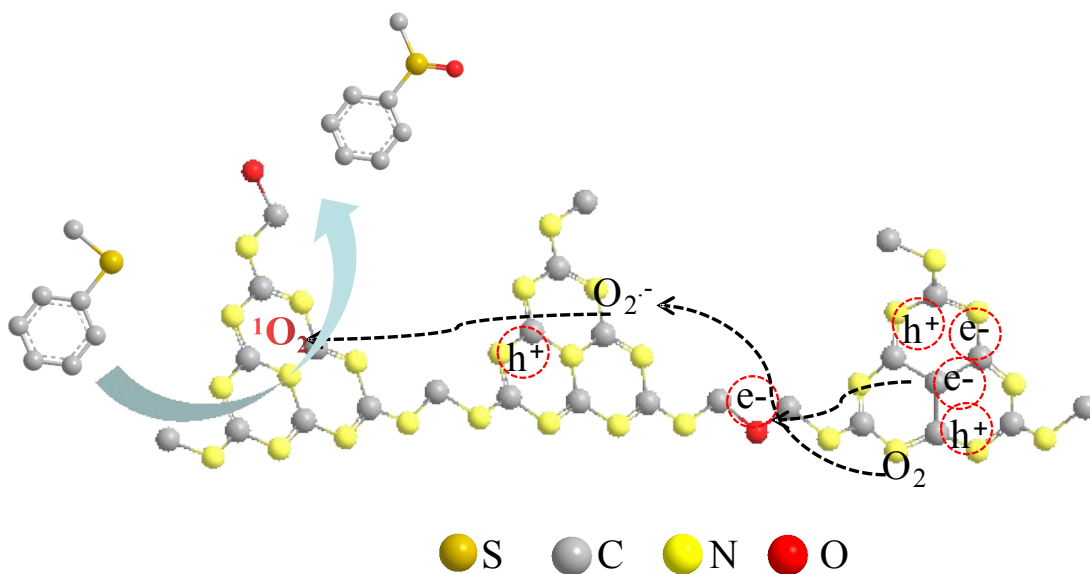

Fig. S18. Plausible mechanism for the photocatalytic selective oxidation of sulfides over COCN-2 under visible light irradiation.

Based on the above results and the relevant mechanisms reported in the literature,<sup>S23-S24</sup> a plausible mechanism for this photocatalytic oxidation over COCN-2 is proposed in Fig. S18. Under light illumination, COCN-2 was easily photoexcited

and produced electrons and holes pairs. Photogenerated electrons will react to the surface of  $O_2$  to form a radical species  $O_2^{\bullet-}$ . Subsequently, then a quantity of  $O_2^{\bullet-}$  was attacked by  $h^+$  to form the  $^1O_2$ . Finally, the sulfoxide product could be obtained from further oxidizing sulfide using the singlet oxygen. Another minor route is that the surface holes react with sulfide to form the corresponding intermediate which further reacts with  $O_2^{\bullet-}$  to produce sulfoxide.

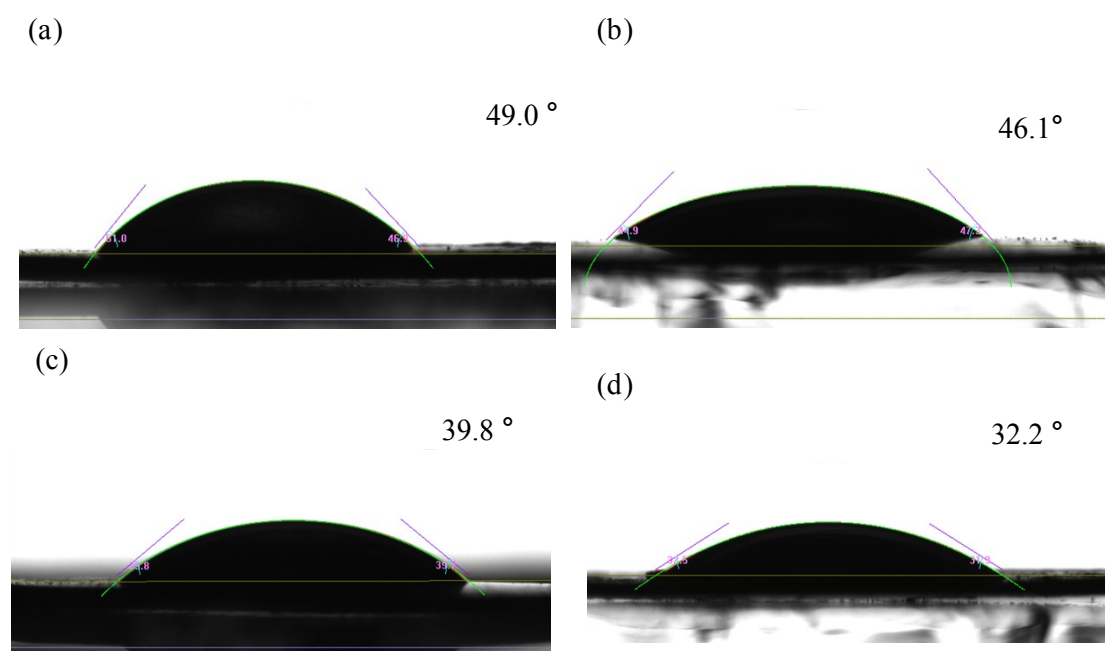

**Fig. S19.** Contact-angle of water on the surface of (a)  $C_3N_4$ , (b) COCN-3, (c) COCN-2 and (d) COCN-1.



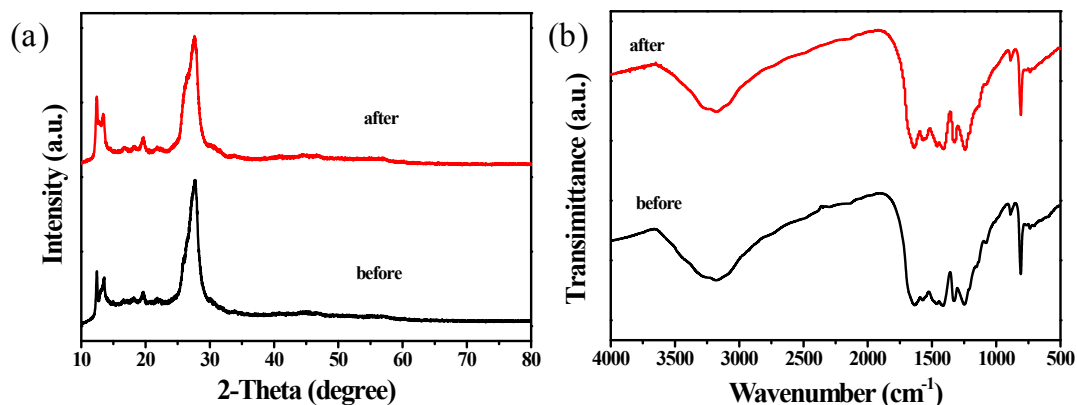

**Fig. S20.** (a) XRD and (b) FTIR spectra of COCN-2 before and after eight cycles for photocatalytic H<sub>2</sub> production.

## REFERENCES

- S1 J. Li, Y. Chen, X. Yang, S. Gao and R. Cao, *J. Catal.* 2020, **381**, 579.
- S2 Y. Xu, Z.-C. Fu, S. Cao, Y. Chen and W.-F. Fu, *Catal. Sci. & Technol.* 2017, **7**, 587.
- S3 X. Chen, K. Deng, P. Zhou and Z. Zhang, *ChemSusChem* 2018, **11**, 2444.
- S4 X. Ma, H. Hao, W. Sheng, F. Huang and X. Lang, *J. Mater. Chem. A* 2021, **9**, 2214.
- S5 X. Lan, Q. Li, Y. Zhang, Q. Li, L. Ricardez-Sandoval and G. Bai, *Appl. Catal. B: Environ.* 2020, **277**, 119274.
- S6 J.-L. Shi and X. Lang, *Chem. Eng. J.* 2020, **392**, 123632.
- S7 C. G. López-Calixto, S. Cabrera, R. Pérez-Ruiz, M. Barawi, J. Alemán, V. A. de la Peña O'Shea and M. Liras, *Appl. Catal. B: Environ.* 2019, **258**, 117933.
- S8 L. Q. Wei and B. H. Ye, *ACS Appl. Mater. Inter.* 2019, **11**, 41448.
- S9 X. N. Zou, D. Zhang, T. X. Luan, Q. Li, L. Li, P. Z. Li and Y. Zhao, *ACS Appl.*

*Mater. Inter.* 2021, <https://doi.org/10.1021/acsami.1c03083>

- S10 X. Cheng, J. Zhang, L. Liu, L. Zheng, F. Zhang, R. Duan, Y. Sha, Z. Su and F. Xie, *Green Chem.* 2021, **23**, 1165.
- S11 Y. Qian, D. Li, Y. Han and H.-L. Jiang, *J. Am. Chem. Soc.* 2020, **142**, 20763.
- S12 A. López-Magano, A. E. Platero-Prats, S. Cabrera, R. Mas-Ballesté and J. Alemán, *Appl. Catal. B: Environ.* 2020, **272**, 119027.
- S13 Q. Li, X. Lan, G. An, L. Ricardez-Sandoval, Z. Wang and G. Bai, *ACS Catal.* 2020, **10**, 6664.
- S14 D.-Y. Zheng, E.-X. Chen, C.-R. Ye and X.-C. Huang, *J. Mater. Chem. A* 2019, **7**, 22084
- S15 H. Wang, S. Jiang, S. Chen, D. Li, X. Zhang, W. Shao, X. Sun, J. Xie, Z. Zhao, Q. Zhang, Y. Tian and Y. Xie, *Adv. Mater.* 2016, **28**, 6940.
- S16 Y. A. Workie, Sabrina, T. Imae, M. P. Krafft, *ACS Biomater. Sci. Eng.*, 2019, **5**, 2926.
- S17 G. Zhang, Y. Xu, C. He, P. Zhang, H. Mi, *Appl. Catal. B: Environ.*, 2021, **283**, 119636.
- S18 Y. Li, J. Ren, S. Ouyang, W. Hou, T. Petit, H. Song, H. Chen, D. Philo, T. Kako, J. Ye, *Appl. Catal. B: Environ.*, 2019, **259**, 118027.
- S19 Y. Yu, W. Yan, X. Wang, P. Li, W. Gao, H. Zou, S. Wu, K. Ding, *Adv. Mater.* 2018, **30**, 1705060.
- S20 Y. Ejeta, T. Imae, *J. Photoch. Photobio. A: Chem.*, 2021, **404**, 112955.
- S21 H. Wang, X. Yang, W. Shao, S. Chen, J. Xie, X. Zhang, J. Wang, Y. Xie, *J. Am.*

*Chem. Soc.*, 2015, **137**, 11376.

S22 S. Zhao, X. Zhao, *Appl. Catal. B: Environ.*, 2019, **250**, 408.

S23 J. Jiang, R. Luo, X. Zhou, Y. Chen, H. Ji, *Adv. Synth. & Catal.*, 2018, **360**, 4402.

S24 X. Chen, K. Deng, P. Zhou, Z. Zhang, *ChemSusChem*, 2018, **11**, 2444.
